# Supplementary material for: Calculating uncertainty for the RICE ice core continuous flow analysis water isotope record
Source: Copernicus journal article supplement (doi:10.5194/amt-11-4725-2018), 2018-08-13
Supplement: Supplementary file 1 [file amt-11-4725-2018-supplement.pdf]

Supplement of Atmos. Meas. Tech., 11, 4725–4736, 2018  
<https://doi.org/10.5194/amt-11-4725-2018-supplement>  
© Author(s) 2018. This work is distributed under  
the Creative Commons Attribution 4.0 License.

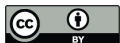

*Supplement of*

## **Calculating uncertainty for the RICE ice core continuous flow analysis water isotope record**

**Elizabeth D. Keller et al.**

*Correspondence to:* Elizabeth D. Keller (l.keller@gns.cri.nz)

The copyright of individual parts of the supplement might differ from the CC BY 4.0 License.

**Figures**

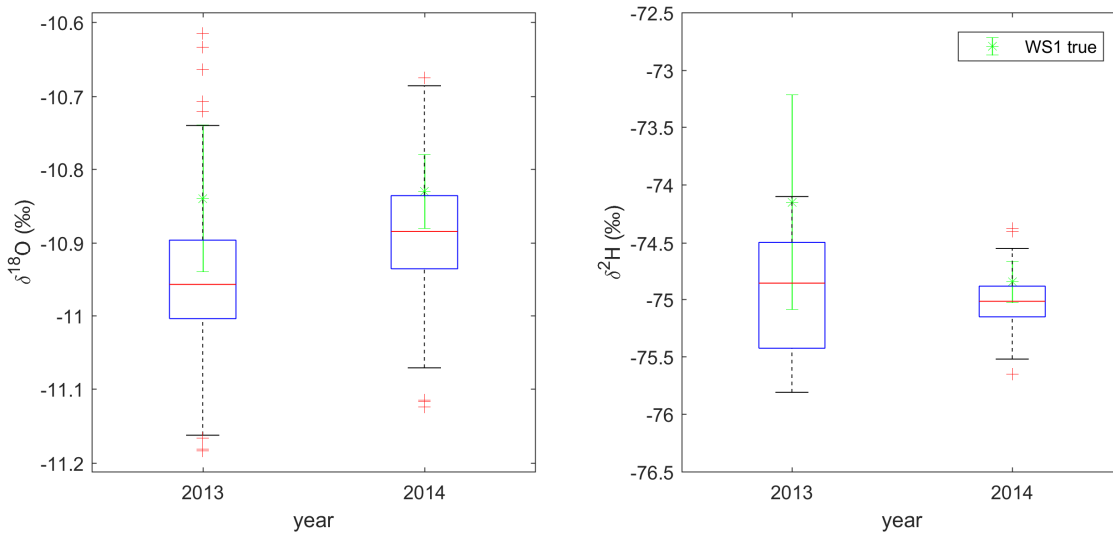

5 **Figure S1. Box and Whisker plot showing the spread of WS1  $\delta^{18}\text{O}$  (left) and  $\delta^2\text{H}$  (right) measurements (after calibration using Eq. 3) used to calculate the calibration error. The median is shown as a red line. The blue boxes indicate the 25<sup>th</sup> and 75<sup>th</sup> percentiles. Red crosses indicate outliers. Green star indicates the assigned “true” value of WS1 as determined in each year, shown with error bars, corresponding to the values reported in Table 1.**

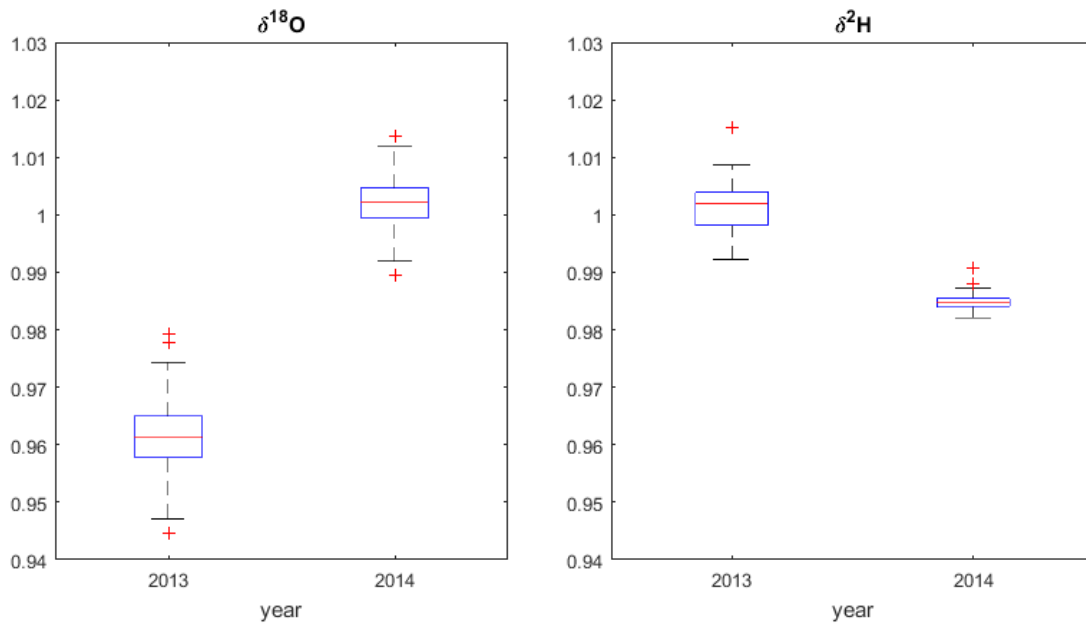

10 **Figure S2. Box and Whisker plot showing the range of calculated slopes (Eq. 2) used to calibrate the  $\delta^{18}\text{O}$  (left) and  $\delta^2\text{H}$  (right) isotope data in Eq. 3. The median is shown as a red line. The blue boxes indicate the 25<sup>th</sup> and 75<sup>th</sup> percentiles. Red crosses indicate outliers.**

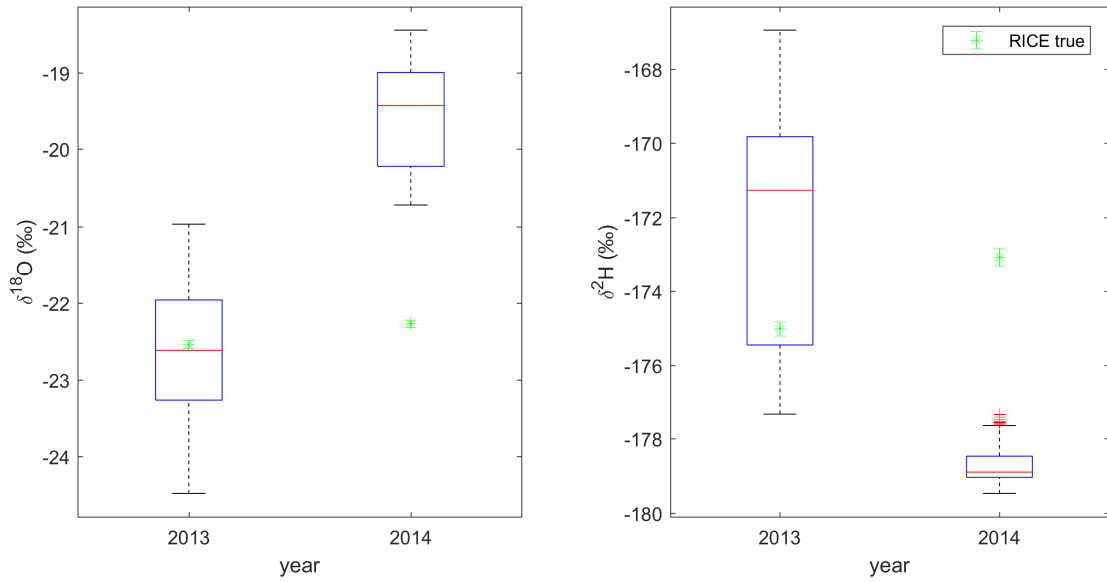

5 **Figure S3. Box and Whisker plot showing the range of RICE standard  $\delta^{18}\text{O}$  (left) and  $\delta^2\text{H}$  (right) measurements (raw) used to calibrate the isotope data in Eq. 3. The median is shown as a red line. The blue boxes indicate the 25<sup>th</sup> and 75<sup>th</sup> percentiles. Red crosses indicate outliers. Green star indicates the assigned “true” value of RICE as determined in each year, shown with error bars, corresponding to the values reported in Table 1. (Note some errors are too small to be visible on the scale of the plot.)**

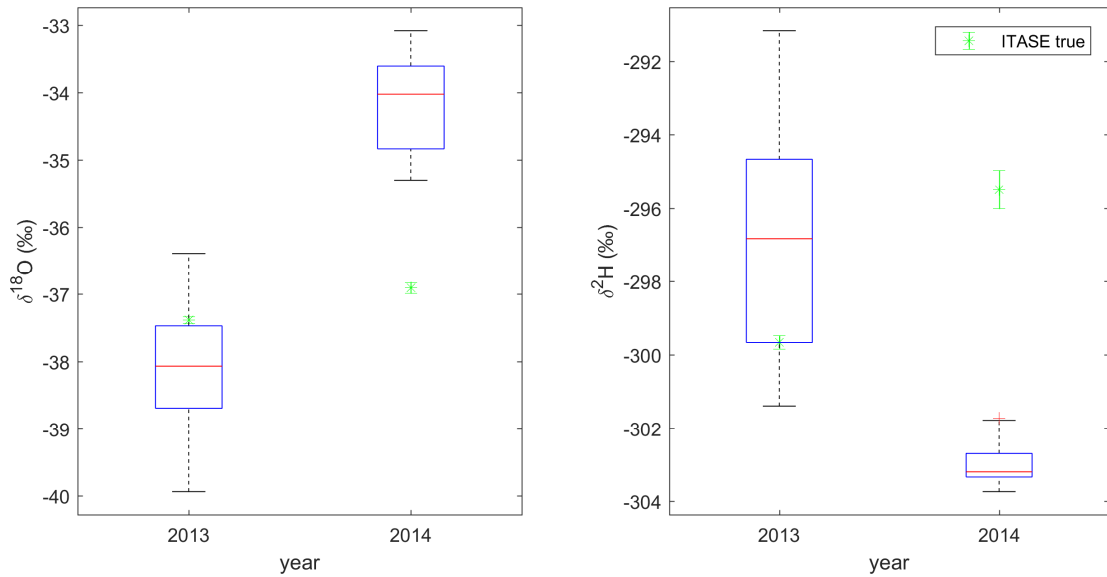

10 **Figure S4. Box and Whisker plot showing the range of ITASE standard  $\delta^{18}\text{O}$  (left) and  $\delta^2\text{H}$  (right) measurements (raw) used to calibrate the isotope data in Eq. 3. The median is shown as a red line. The blue boxes indicate the 25<sup>th</sup> and 75<sup>th</sup> percentiles. Red crosses indicate outliers. Green star indicates the assigned “true” value of ITASE as determined in each year, shown with error bars, corresponding to the values reported in Table 1. (Note some errors are too small to be visible on the scale of the plot.)**

## Tables

5 **Table S1. Mean and standard deviation (SD) for WS1 after calibration (using Eq. 3), RICE and ITASE (raw measurements) and slope corrections used in Eq. 3 to calibrate the isotope data.**

| Water Standard                 | $\delta^{18}\text{O}$ (‰) |       | $\delta^2\text{H}$ (‰) |       |
|--------------------------------|---------------------------|-------|------------------------|-------|
|                                | Mean                      | SD    | Mean                   | SD    |
| <b>WS1-13<br/>(calibrated)</b> | -10.95                    | 0.096 | -74.95                 | 0.491 |
| <b>WS1-14<br/>(calibrated)</b> | -10.89                    | 0.078 | -75.02                 | 0.203 |
| <b>RICE-13<br/>(raw)</b>       | -22.62                    | 0.798 | -172.53                | 2.907 |
| <b>RICE-14<br/>(raw)</b>       | -19.60                    | 0.661 | -178.69                | 0.520 |
| <b>ITASE-13<br/>(raw)</b>      | -38.07                    | 0.790 | -297.14                | 2.634 |
| <b>ITASE-14<br/>(raw)</b>      | -34.21                    | 0.651 | -303.00                | 0.497 |
| <b>Slope (2013)</b>            | 0.96                      | 0.006 | 1.00                   | 0.004 |
| <b>Slope (2014)</b>            | 1.00                      | 0.004 | 0.98                   | 0.001 |
